# Supplementary material
Source: PubMed Central journal article supplement (PMC3650348)
Supplement: supp_O112.021907_mcp.O112.021907-1.pdf [file supp_O112.021907_mcp.O112.021907-1.pdf]

| File Name                      | Uniform Resource Identifier                                                                                                                                                                                     | Size       | MD5                              |
|--------------------------------|-----------------------------------------------------------------------------------------------------------------------------------------------------------------------------------------------------------------|------------|----------------------------------|
| 120427_FL_A3_02.mzML           | <a href="http://srm.swegrid.se/snic/bils/lu_proteomics/orbi/mzml/201204/120427_FL_A3_02.mzML.gz">http://srm.swegrid.se/snic/bils/lu_proteomics/orbi/mzml/201204/120427_FL_A3_02.mzML.gz</a>                     | 1861483475 | 5450435ed61d8fc6e17b9ealc40a47c9 |
| 120427_FL_A3_01.mzML           | <a href="http://srm.swegrid.se/snic/bils/lu_proteomics/orbi/mzml/201204/120427_FL_A3_01.mzML.gz">http://srm.swegrid.se/snic/bils/lu_proteomics/orbi/mzml/201204/120427_FL_A3_01.mzML.gz</a>                     | 1939872752 | df89a58dd3b389f5d6d6b01dcb948514 |
| 111205_FL_A3_02.mzML           | <a href="http://srm.swegrid.se/snic/bils/lu_proteomics/orbi/mzml/201112/111205_FL_A3_02.mzML.gz">http://srm.swegrid.se/snic/bils/lu_proteomics/orbi/mzml/201112/111205_FL_A3_02.mzML.gz</a>                     | 2029629727 | 5f099af4562a3a822405dc3daf8a54d3 |
| 120427_FL_8A3_4A6_01.mzML      | <a href="http://srm.swegrid.se/snic/bils/lu_proteomics/orbi/mzml/201204/120427_FL_8A3_4A6_01.mzML.gz">http://srm.swegrid.se/snic/bils/lu_proteomics/orbi/mzml/201204/120427_FL_8A3_4A6_01.mzML.gz</a>           | 1845805801 | fb95c75c85adc1fc6fb5d02f9eb4a503 |
| 111209_FL_8ulA3_4ulA6_02.mzML  | <a href="http://srm.swegrid.se/snic/bils/lu_proteomics/orbi/mzml/201112/111209_FL_8ulA3_4ulA6_02.mzML.gz">http://srm.swegrid.se/snic/bils/lu_proteomics/orbi/mzml/201112/111209_FL_8ulA3_4ulA6_02.mzML.gz</a>   | 1946562844 | 5d8190172b12d521bec931e22481a571 |
| 111208_FL_8ulA3_4ulA6_01.mzML  | <a href="http://srm.swegrid.se/snic/bils/lu_proteomics/orbi/mzml/201112/111208_FL_8ulA3_4ulA6_01.mzML.gz">http://srm.swegrid.se/snic/bils/lu_proteomics/orbi/mzml/201112/111208_FL_8ulA3_4ulA6_01.mzML.gz</a>   | 1984971954 | b1942c3738e5f3eaec47fbbecb39e56f |
| 111209_FL_4ulA3_8ulA6_02.mzML  | <a href="http://srm.swegrid.se/snic/bils/lu_proteomics/orbi/mzml/201112/111209_FL_4ulA3_8ulA6_02.mzML.gz">http://srm.swegrid.se/snic/bils/lu_proteomics/orbi/mzml/201112/111209_FL_4ulA3_8ulA6_02.mzML.gz</a>   | 1969468024 | 0c6b4ae4e46fa7b403bc5463eac9ef9d |
| 111209_FL_4ulA3_8ulA6_01.mzML  | <a href="http://srm.swegrid.se/snic/bils/lu_proteomics/orbi/mzml/201112/111209_FL_4ulA3_8ulA6_01.mzML.gz">http://srm.swegrid.se/snic/bils/lu_proteomics/orbi/mzml/201112/111209_FL_4ulA3_8ulA6_01.mzML.gz</a>   | 1935774603 | 3c44c84092476bd2f82f6e80a0492c8d |
| 111208_FL_4ulA3_8ulA6_01.mzML  | <a href="http://srm.swegrid.se/snic/bils/lu_proteomics/orbi/mzml/201112/111208_FL_4ulA3_8ulA6_01.mzML.gz">http://srm.swegrid.se/snic/bils/lu_proteomics/orbi/mzml/201112/111208_FL_4ulA3_8ulA6_01.mzML.gz</a>   | 1133241603 | 619ac21f2a8949528c27c58c6b37628e |
| 111208_FL_0ulA3_12ulA6_01.mzML | <a href="http://srm.swegrid.se/snic/bils/lu_proteomics/orbi/mzml/201112/111208_FL_0ulA3_12ulA6_01.mzML.gz">http://srm.swegrid.se/snic/bils/lu_proteomics/orbi/mzml/201112/111208_FL_0ulA3_12ulA6_01.mzML.gz</a> | 1964410180 | bfdddf50533f79e5078e3c0765c2ed0  |
| 111209_FL_0ulA3_12ulA6_02.mzML | <a href="http://srm.swegrid.se/snic/bils/lu_proteomics/orbi/mzml/201112/111209_FL_0ulA3_12ulA6_02.mzML.gz">http://srm.swegrid.se/snic/bils/lu_proteomics/orbi/mzml/201112/111209_FL_0ulA3_12ulA6_02.mzML.gz</a> | 1925575739 | af6153693fcc0464f116aa240a3ebb34 |
| 111202_FL_A6_01.mzML           | <a href="http://srm.swegrid.se/snic/bils/lu_proteomics/orbi/mzml/201112/111202_FL_A6_01.mzML.gz">http://srm.swegrid.se/snic/bils/lu_proteomics/orbi/mzml/201112/111202_FL_A6_01.mzML.gz</a>                     | 2014584635 | b23d7f037f88636635cca7f10d99e0b3 |
| 111202_FL_B4_01.mzML           | <a href="http://srm.swegrid.se/snic/bils/lu_proteomics/orbi/mzml/201112/111202_FL_B4_01.mzML.gz">http://srm.swegrid.se/snic/bils/lu_proteomics/orbi/mzml/201112/111202_FL_B4_01.mzML.gz</a>                     | 2074190890 | 04f6a23e34c0d27babda6644f2198435 |
| 111208_FL_12ulB4_0ulC4_01.mzML | <a href="http://srm.swegrid.se/snic/bils/lu_proteomics/orbi/mzml/201112/111208_FL_12ulB4_0ulC4_01.mzML.gz">http://srm.swegrid.se/snic/bils/lu_proteomics/orbi/mzml/201112/111208_FL_12ulB4_0ulC4_01.mzML.gz</a> | 2040971119 | 535cb04eec17ec72a771f86c705d1fa6 |
| 111209_FL_12ulB4_0ulC4_02.mzML | <a href="http://srm.swegrid.se/snic/bils/lu_proteomics/orbi/mzml/201112/111209_FL_12ulB4_0ulC4_02.mzML.gz">http://srm.swegrid.se/snic/bils/lu_proteomics/orbi/mzml/201112/111209_FL_12ulB4_0ulC4_02.mzML.gz</a> | 2031817172 | d3315ac9f5604b4d147e9ff19c6fab6a |
| 111209_FL_12ulB4_6ulC4_02.mzML | <a href="http://srm.swegrid.se/snic/bils/lu_proteomics/orbi/mzml/201112/111209_FL_12ulB4_6ulC4_02.mzML.gz">http://srm.swegrid.se/snic/bils/lu_proteomics/orbi/mzml/201112/111209_FL_12ulB4_6ulC4_02.mzML.gz</a> | 2030652769 | d354c887bd9be50fe9a5f40b8fc3176b |
| 111208_FL_12ulB4_6ulC4_01.mzML | <a href="http://srm.swegrid.se/snic/bils/lu_proteomics/orbi/mzml/201112/111208_FL_12ulB4_6ulC4_01.mzML.gz">http://srm.swegrid.se/snic/bils/lu_proteomics/orbi/mzml/201112/111208_FL_12ulB4_6ulC4_01.mzML.gz</a> | 2003911181 | ba6b2b26e7827e47d186e7d5a368e270 |
| 111209_FL_12ulB4_6ulC4_03.mzML | <a href="http://srm.swegrid.se/snic/bils/lu_proteomics/orbi/mzml/201112/111209_FL_12ulB4_6ulC4_03.mzML.gz">http://srm.swegrid.se/snic/bils/lu_proteomics/orbi/mzml/201112/111209_FL_12ulB4_6ulC4_03.mzML.gz</a> | 2077493119 | 42ca3e7e57fb0f0efe66570d73dbf7f5 |
| 111209_FL_6ulB4_12ulC4_02.mzML | <a href="http://srm.swegrid.se/snic/bils/lu_proteomics/orbi/mzml/201112/111209_FL_6ulB4_12ulC4_02.mzML.gz">http://srm.swegrid.se/snic/bils/lu_proteomics/orbi/mzml/201112/111209_FL_6ulB4_12ulC4_02.mzML.gz</a> | 2022048721 | 4ca8a73356897eb58645b656623d0511 |
| 111209_FL_6ulB4_12ulC4_03.mzML | <a href="http://srm.swegrid.se/snic/bils/lu_proteomics/orbi/mzml/201112/111209_FL_6ulB4_12ulC4_03.mzML.gz">http://srm.swegrid.se/snic/bils/lu_proteomics/orbi/mzml/201112/111209_FL_6ulB4_12ulC4_03.mzML.gz</a> | 2072863081 | 7474132f618cdbde4e6bbca9019d8c34 |
| 111208_FL_6ulB4_12ulC4_01.mzML | <a href="http://srm.swegrid.se/snic/bils/lu_proteomics/orbi/mzml/201112/111208_FL_6ulB4_12ulC4_01.mzML.gz">http://srm.swegrid.se/snic/bils/lu_proteomics/orbi/mzml/201112/111208_FL_6ulB4_12ulC4_01.mzML.gz</a> | 2010509777 | 6e1ac709ca8643852da36039b6501511 |
| 111209_FL_0ulB4_12ulC4_02.mzML | <a href="http://srm.swegrid.se/snic/bils/lu_proteomics/orbi/mzml/201112/111209_FL_0ulB4_12ulC4_02.mzML.gz">http://srm.swegrid.se/snic/bils/lu_proteomics/orbi/mzml/201112/111209_FL_0ulB4_12ulC4_02.mzML.gz</a> | 2013857601 | 975f58cd4c980e7cd0b7908f242445a6 |
| 111208_FL_0ulB4_12ulC4_01.mzML | <a href="http://srm.swegrid.se/snic/bils/lu_proteomics/orbi/mzml/201112/111208_FL_0ulB4_12ulC4_01.mzML.gz">http://srm.swegrid.se/snic/bils/lu_proteomics/orbi/mzml/201112/111208_FL_0ulB4_12ulC4_01.mzML.gz</a> | 2007203225 | 00e3432a3a8f3831d49d9203d2fbfc77 |
| 111207_FL_C4_01.mzML           | <a href="http://srm.swegrid.se/snic/bils/lu_proteomics/orbi/mzml/201112/111207_FL_C4_01.mzML.gz">http://srm.swegrid.se/snic/bils/lu_proteomics/orbi/mzml/201112/111207_FL_C4_01.mzML.gz</a>                     | 1965283265 | f1b4e259aba0fc6ab5832b9ff466e4be |
